# Supplementary material for: Sequential release of double drug (graded distribution) loaded gelatin microspheres/PMMA bone cement
Source: Royal Society of Chemistry journal article supplement (doi:10.1039/d0tb01452d), 2020-11-23
Supplement: d0tb01452d1.pdf [file d0tb01452d1.pdf]

## Sequential release of double drugs (graded distribution) loaded gelatin microspheres/PMMA bone cement

### Supporting Information

#### S1.1. Particle size distribution of the microspheres

The particle size of the synthetic ALN-loaded gelatin microspheres was ranging from 35  $\mu\text{m}$  to 74.5  $\mu\text{m}$  in Fig. S1(a), while the large particle size from 45  $\mu\text{m}$  to 86  $\mu\text{m}$  was exhibited in the GS/ALN-dual-loaded gelatin microspheres in Fig. S1(b). This phenomenon was attributed to the swelling property of gelatin, which led to the increased volume after immersing the ALN-loaded gelatin microspheres into the GS solution.

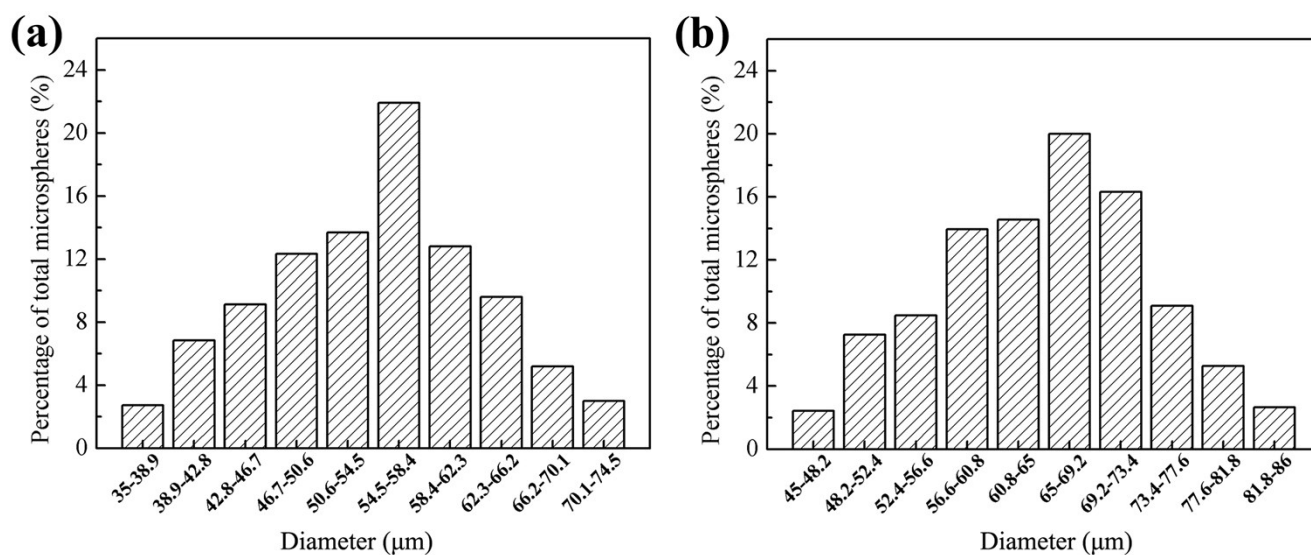

**Fig. S1.** Particle size distribution of (a) ALN-loaded gelatin microspheres; (b) GS/ALN-dual-loaded gelatin microspheres.
